# Supplementary material
Source: PubMed Central journal article supplement (PMC9729422)
Supplement: NIHMS1841041-supplement-Supplemental_Data_File.pdf [file NIHMS1841041-supplement-Supplemental_Data_File.pdf]

# Figure S1

## A

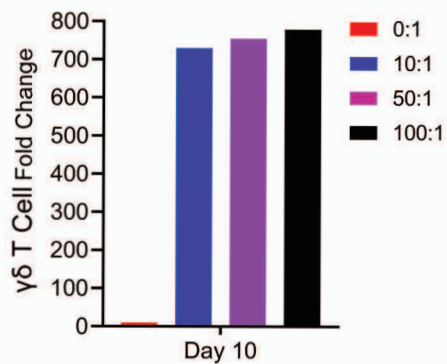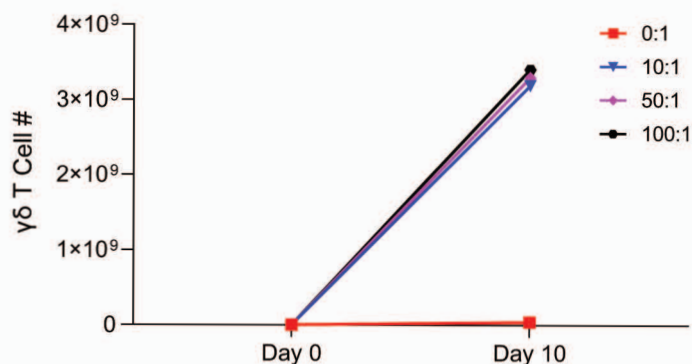

## B

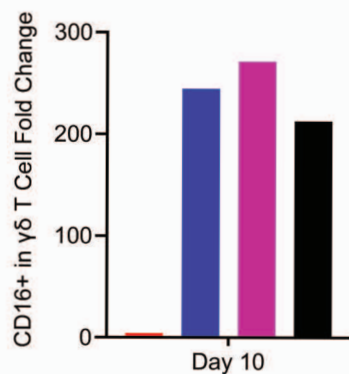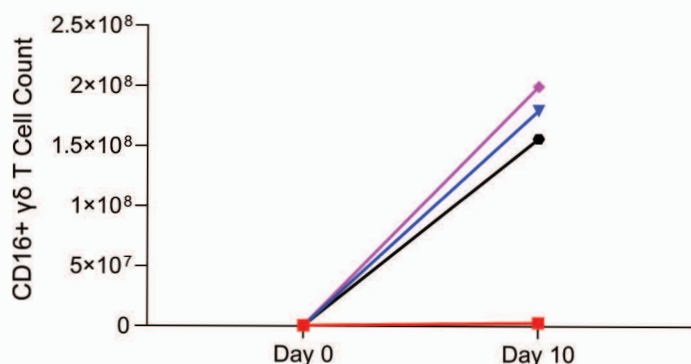

## C

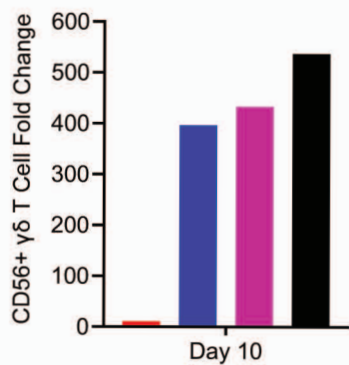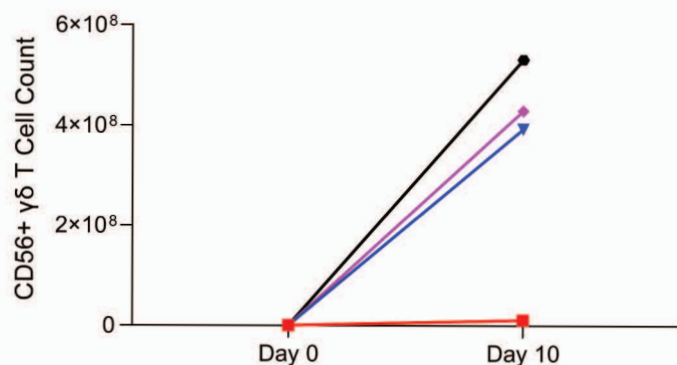

**Table S1**

|                                 |                                                                                                                                                                                                                                                                                                                                                                                                                                                                                                                                                                                                                                                                                                                                                                                                                                                                                                                                                                                                                                                                                                                                                                                                                                                                                                                                                                                                                                                                                                                                                                                                                                                                                                                                                                                                                                                                                                                                                                                                                                                                                                                                                                                                                                                                                                                                                                                                                                                                                                                                                                                                                                                                                                                                                                                                                                                                                                                                                                                                                                                                                                                                                                                                                                                                                                                                                                                                                                                                                                                                                                                                                                                                                                                                                                                                                                                                                                                                                                                                                                                                                                                                                                                                                                                                                                                                                                                                                                                                                                                                                                                                                                                                                                                                                                                                                                                                                                                              |
|---------------------------------|------------------------------------------------------------------------------------------------------------------------------------------------------------------------------------------------------------------------------------------------------------------------------------------------------------------------------------------------------------------------------------------------------------------------------------------------------------------------------------------------------------------------------------------------------------------------------------------------------------------------------------------------------------------------------------------------------------------------------------------------------------------------------------------------------------------------------------------------------------------------------------------------------------------------------------------------------------------------------------------------------------------------------------------------------------------------------------------------------------------------------------------------------------------------------------------------------------------------------------------------------------------------------------------------------------------------------------------------------------------------------------------------------------------------------------------------------------------------------------------------------------------------------------------------------------------------------------------------------------------------------------------------------------------------------------------------------------------------------------------------------------------------------------------------------------------------------------------------------------------------------------------------------------------------------------------------------------------------------------------------------------------------------------------------------------------------------------------------------------------------------------------------------------------------------------------------------------------------------------------------------------------------------------------------------------------------------------------------------------------------------------------------------------------------------------------------------------------------------------------------------------------------------------------------------------------------------------------------------------------------------------------------------------------------------------------------------------------------------------------------------------------------------------------------------------------------------------------------------------------------------------------------------------------------------------------------------------------------------------------------------------------------------------------------------------------------------------------------------------------------------------------------------------------------------------------------------------------------------------------------------------------------------------------------------------------------------------------------------------------------------------------------------------------------------------------------------------------------------------------------------------------------------------------------------------------------------------------------------------------------------------------------------------------------------------------------------------------------------------------------------------------------------------------------------------------------------------------------------------------------------------------------------------------------------------------------------------------------------------------------------------------------------------------------------------------------------------------------------------------------------------------------------------------------------------------------------------------------------------------------------------------------------------------------------------------------------------------------------------------------------------------------------------------------------------------------------------------------------------------------------------------------------------------------------------------------------------------------------------------------------------------------------------------------------------------------------------------------------------------------------------------------------------------------------------------------------------------------------------------------------------------------------------------------------|
| humanCD3<br>scFv-P2A-<br>CD137L | GCGGCCGCCACCACAACACCCGCTCCAGACCTCCACACCCGCTCCTACCATCGCTAGCCAGCCTCT<br>CTCTTTAAGACCCGAGGCTTG TAGACCCGCTGCCGAGGAGCCGTGCACACCAGAGGTTTAGACTTCCG<br>CTTGCGACATCTATATCTGGGCTCCTCTCGCCGAACTTG TGGAGTGCTGCTGCTCTTTAGTGATTA<br>CTTTATACTGCAACCATCGTAATCGTAGGAGGGTGTGCAAATGCCCCAGACCCGTTGTCAAGAGCGGC<br>GACAAGCCCTCTTTATCCGCTAGATACGTGGGAAGCGGAGCCACCAATTTCTTTACTGAAGCAAGCT<br>GGCGACGTGGAGGAGAATCCCGGCCCATGGAGTACGCCAGCGATGCCTCTTTAGACCCCCGAAGCTC<br>CTTGGCCTCCCGCTCCCAGAGCTAGGGCTTG TAGGGTGTGCCTTGGGCTTGTAGTGGCTGGATTACTG<br>CTGCTGTTACTGCTGGCCCGCCTTG TGCCGTGTTTCTGGCTTGTCTTGGGCTGTCAAGCGGAGCTCG<br>TGCTAGCCCCGTTAGCGCTGCCTCCCCTAGACTGAGAGAGGGACCCGAACTGAGCCCCGATGATCCC<br>GCTGGTTTACTGGATTAAGGCAAGGTATGTT CGCCCAGCTGGTGGCCAGAACGTTTACTGATTGAT<br>GGCCCTTTATCTTGGTACAGCGATCCC GGACTGGCCGGAGTGAGCCTCACCGGCCGCTCAGCTACAA<br>GGAGGATACCAAGGAGCTGGTGGTGGCTAAGGCCGGCGTCTACTACGTCTTCTTTAGCTGGAGCTGA<br>GGAGGGTGGTGGCCGAGAGGGATCCGGAAGCTGAGCCTCGCTTACATCGCAACCTTAAAGATTCC<br>GCTGCTGGCGCTGCTGCTCTGGCTCTGACCGTGATCTGCCTCCCGCTAGCAGCGAGGCTCGTAACTC<br>CGCCTTCGGATTCCAAGGTAGACTGCTGCATTTAAGCGCTGGCCAGAGACTGGGCCTGCATTTACACA<br>CAGAGGCTCGTGCTAGGCACGCTTGGCACTGACCCAAGGTGCCACCGTGTGGGTTTATTTCGTGTC<br>ACCCCGAAATCCCGCCGCTCCCAGCCTCCCGAGGAGTGACAGCGAGTGACAGCCACTCGAGATCACTT<br>GTCCAATTTGTTAAAGACAGGATATCAGTGGTCCAGGCTCTAGTTTTGACTCAACAATATCACCAGCTGA<br>AGCCTATAGAGTACGAGCCATAGATAAAATAAAAGATTTTATTTAGTCTCCAGAAAAAGGGGGGAAATGAA<br>AGACCCCACCTGTAGGTTTGGCAAGCTAGCTTAAGTAAACGCCATTTTGAAGGCATGGAAAAATACATA<br>ACTGAGAAATAGAGAAGTTCAGATCAAGGTCAGGAACAGATGGAACAGCTGAATATGGCCAAACAGGA<br>TATCTGTGGTAAGCAGTTCTGCCCGGCTCAGGGCCAAGAACAGATGGAACAGCTGAATATGGGCCA<br>AACAGGATATCTGTGGTAAGCAGTTCCTGCCCGGCTCAGGGCCAAGAACAGATGGTCCCAGATGCG<br>GTCCAGCCCTCAGCAGTTTCTAGAGAACCATCAGATGTTTCCAGGGTGCACCAAGGACCTGAAATGAC<br>CTGTCGCTTATTTGAACTAACCAATCAGTTCTGCTTCTCGCTTGTTCGCGCGCTTCTGCTCCCGAG<br>CTCAATAAAAGAGCCCAACACCCCTCACTCGGGCGCCAGTCTCCGATTGACTGAGTCCGCCGGGTA<br>CCCGTGTATCCAATAAACCCCTCTTG CAGTTGCATCCGACTTGTGGTCTCGCTGTTCCTGGGAGGGTCT<br>CCTCTGAGTGATTGACTACCCGTCAGCGGGGGCTTTTCACACATGCAGCATGTATCAAAATTAATTTGG<br>TTTTTTTTCTTAAGTATTTACATTAATGGCCATAGTACTTAAAGTTACATTTGGCTTCCTTGAATAAACAT<br>GGAGTATTCAGAATGTGCATAAAATATTTCTAATTTTAAAGATAGTATCTCCATTGGCTTCTACTCTTTCTT<br>TTATTTTTTTTTGTCCTCTGTCTTCCATTTGTTGTTGTTGTTGTTGTTGTTGTTGTTGTTGGTGGTGGT<br>TAATTTTTTTTTAAAGATCCTACACTATAGTTC AAGCTAGACTATTAGCTACTCTGTAAACCCAGGGTGACC<br>TTGAAGTCATGGGTAGCCTGCTGTTTTAGCCTTCCCACATCTAAGATTACAGGTATGAGCTATCATTTTT<br>GGTATATTGATTGATTGATTGATTGATGTGTGTGTGTGTGATTGTGTTGTGTGTGTGAAAATG<br>TGTGTATGGGTGTGTGTGAATGTGTGTATGTATGTGTGTGTGTGAGTGTGTGTGTGTGTGTGATGT<br>GTGTGTGTGTGACTGTGTCTATGTGTATGACTGTGTGTGTGTGTGTGTGTGTGTGTGTGTGTGTGTG<br>TGTGTGTTGTGAAAAAATTTCTATGGTAGTGAGAGCCAACGCTCCGGCTCAGGTGTCAGGTGGT<br>TTTGAGACAGAGTCTTTCACTTAGCTTGGAACTCACTGGCCGTGTTTTTACAACTCGTGAAGCAGTGG<br>AAACCCCTGGCGTTACCCAACTAATCGCCTTGCAGCACATCCCCCTTTCGCCAGCTGGCGTAAATGGCA<br>AGGAAGGAGGCGACCGATCGCCCTCCCAACAGTTGCGCAGCCTGAATGGCGAATGGCGCCTGATGCG<br>GATTTCTCCTTACGCATCTGTGCGGTATTTACACCCGATATGGTGCATCTCAGTACAATCTGCTCTGATGC<br>CGCATAGTTAAGCCAGCCCCGACACCCGCAACCCGCTGACGCGCCCTGACGGGCTTGTCTGCTC<br>CCGGCATCCGCTTACAGACAAGCTGTGACCGTCTCCGGGAGCTGCATGTGTGACAGGTTTTTCCGCTC<br>ATCACCGAAACGCGCGATGACGAAAGGCCCTCGTGATACGCCTATTTTTATAGGTTAATGTGATGATA<br>TAATGGTTTTCTAGACGTGAGGTGGCATTTCGCGGAAATGTGCGCGGAACCCCTAACTACTCTAGC<br>TTCCCAGCAACAATTAAGACTGGATGGAGGCGGATAAAGTTCAGGACCCTCTGCGCTCGGCC<br>TTCCGGCTGGCTGGTTTTATTGCTGATAAATCTGGAGCCGCTGAGCGTGGGCTCGCAGTATCATTGCA<br>GCACTGGGGCCAGATGGTAAGCCCTCCCGTATCGTAGTTATCTACACGACGGGGAGTCAGGCAACTAT<br>GGATGAAACGAAATAGACAGATCGCTGAGATAGGTGCCTCACTGATTAAGCATTGGTAACTGTCAAGCCA<br>AGTTACTCATATATACTTTAGATTGATTTAAACTTCATTTTTAATTTAAAGGATCTAGGTGAAGATCCT<br>TTTTGATAATCTCATGACCAAAATCCCTAACGTGAGTTTTCGTTCCACTGAGCGTCAAGCCCGTAGAA<br>AAGATCAAAGGATCTTCTTGAGATCCTTTTTTTCTGCGCGTAATCTGCTGCTTGCAAACAAAAAACCA<br>CGCTACCAGCGGTGGTTTTGTTGCCGGATCAAGAGCTACCAACTCTTTTTCCGAAGGTAAGTGGCTTCA<br>GCAGAGCGCAGATACCAAACTGTCCTTCTAGTGATGCCGTAGTTAGGCCACCACCTCAAGAACTCTG<br>TAGACCGCCTACATACCTCGCTCTGCTAATCCTGTACTTACAGTGGCTGCTGCCAGTGGCGATAAGTCT<br>GTCCTTACCGGTTGGACTCAAGACGATAGTTACGGATAAAGGCAGCAGCGGCTGGGCTGAAACGGGGG<br>TTGCTGCACACAGCCCAGCTTGGAGCGAACGACCTACCCGAACTGAGATACCTACAGCGTGAGCATT<br>GAGAAAGCGCCACGCTTCCCGAAGGGAGAAAGCGCGACAGGTATCCGGTAAAGCGGCAAGGTGCGAAC<br>AGGAGAGCGCACGAGGGAGCTTCCAGGGGGAAACGCCTGGTATCTTTATAGTCTGTCCGGTTTCGCG<br>ACCTTACTGACTTGGCGTTCGATTTTTGCTGATCCTGCTGACGGGGGGCGGAGCCTTTCGAAACCGCAGC<br>AACCGCCCTTTTTACGGTTCCTGGCTTTTTGCTGGCTTTTTGCTCACATGTTCTTTCTCGCTTATCCC<br>CTGATTTCTGTGGATAACCGTATTACC GCCTTTGAGTGAGCTGATACCGCTCGCCGAGCCGAACGACC<br>GAGCGCAGCGAGTCACTGAGCGAGGAAGCGGAAGAGCGCCCAATACGCAAACCCGCTTCCCAGCGC<br>GTTGGCCGATTCATTAATGCAGCTGGCAGCAGAGTTTCCCAGCTGGAAGCGGCAAGTGGGCGAAGC<br>GCAATTAATGTGAGTTAGCTCACTCATTAGGCACCCAGGCTTTACACTTATGCTTCCGGCTCGTATGT<br>TGTGTGGAATTGTGAGCGGATAACAATTTACACAGGAAACAGCTATGACCATGATTACGCCAAGCTTT |
|---------------------------------|------------------------------------------------------------------------------------------------------------------------------------------------------------------------------------------------------------------------------------------------------------------------------------------------------------------------------------------------------------------------------------------------------------------------------------------------------------------------------------------------------------------------------------------------------------------------------------------------------------------------------------------------------------------------------------------------------------------------------------------------------------------------------------------------------------------------------------------------------------------------------------------------------------------------------------------------------------------------------------------------------------------------------------------------------------------------------------------------------------------------------------------------------------------------------------------------------------------------------------------------------------------------------------------------------------------------------------------------------------------------------------------------------------------------------------------------------------------------------------------------------------------------------------------------------------------------------------------------------------------------------------------------------------------------------------------------------------------------------------------------------------------------------------------------------------------------------------------------------------------------------------------------------------------------------------------------------------------------------------------------------------------------------------------------------------------------------------------------------------------------------------------------------------------------------------------------------------------------------------------------------------------------------------------------------------------------------------------------------------------------------------------------------------------------------------------------------------------------------------------------------------------------------------------------------------------------------------------------------------------------------------------------------------------------------------------------------------------------------------------------------------------------------------------------------------------------------------------------------------------------------------------------------------------------------------------------------------------------------------------------------------------------------------------------------------------------------------------------------------------------------------------------------------------------------------------------------------------------------------------------------------------------------------------------------------------------------------------------------------------------------------------------------------------------------------------------------------------------------------------------------------------------------------------------------------------------------------------------------------------------------------------------------------------------------------------------------------------------------------------------------------------------------------------------------------------------------------------------------------------------------------------------------------------------------------------------------------------------------------------------------------------------------------------------------------------------------------------------------------------------------------------------------------------------------------------------------------------------------------------------------------------------------------------------------------------------------------------------------------------------------------------------------------------------------------------------------------------------------------------------------------------------------------------------------------------------------------------------------------------------------------------------------------------------------------------------------------------------------------------------------------------------------------------------------------------------------------------------------------------------------------------------------------------------------|

|                                                              |                                                                                                                                                                                                                                                                                                                                                                                                                                                                                                                                                                                                                                                                                                                                                                                                                                                                                                                                                                                                                                                                                                                                                                                                                                                                                                                                                                                                                                                                                                                                                                                                                                                                                                                                                                                                                                                                                                                                                                                                                                                                                                                                                                                                                                                                                                                                                                                                                                                                                                                                                                                                                                                                                                                                                                                                                                                                                                                                                                                                                                                                                                                                                                                                                                                                                                                                                                                                                                                                                                                                                                                                                                                                                                                                                                                                                                                                                                                                                                                                                                                                                                                              |
|--------------------------------------------------------------|------------------------------------------------------------------------------------------------------------------------------------------------------------------------------------------------------------------------------------------------------------------------------------------------------------------------------------------------------------------------------------------------------------------------------------------------------------------------------------------------------------------------------------------------------------------------------------------------------------------------------------------------------------------------------------------------------------------------------------------------------------------------------------------------------------------------------------------------------------------------------------------------------------------------------------------------------------------------------------------------------------------------------------------------------------------------------------------------------------------------------------------------------------------------------------------------------------------------------------------------------------------------------------------------------------------------------------------------------------------------------------------------------------------------------------------------------------------------------------------------------------------------------------------------------------------------------------------------------------------------------------------------------------------------------------------------------------------------------------------------------------------------------------------------------------------------------------------------------------------------------------------------------------------------------------------------------------------------------------------------------------------------------------------------------------------------------------------------------------------------------------------------------------------------------------------------------------------------------------------------------------------------------------------------------------------------------------------------------------------------------------------------------------------------------------------------------------------------------------------------------------------------------------------------------------------------------------------------------------------------------------------------------------------------------------------------------------------------------------------------------------------------------------------------------------------------------------------------------------------------------------------------------------------------------------------------------------------------------------------------------------------------------------------------------------------------------------------------------------------------------------------------------------------------------------------------------------------------------------------------------------------------------------------------------------------------------------------------------------------------------------------------------------------------------------------------------------------------------------------------------------------------------------------------------------------------------------------------------------------------------------------------------------------------------------------------------------------------------------------------------------------------------------------------------------------------------------------------------------------------------------------------------------------------------------------------------------------------------------------------------------------------------------------------------------------------------------------------------------------------------|
|                                                              | <p>GCTCTTAGGAGTTTCTAATACATCCCAAACCTCAAATATATAAAGCATTGACTTGTCTATGCCCTAGG<br/> GGGCGGGGGGAAGCTAAGCCAGCTTTTTTAAACATTTAAAATGTTAATTCATTTTTAAATGCACAGATGT<br/> TTTTATTTTCATAAGGGTTTCAATGTGCATGAATGCTGCAATATTCTGTTACCAAAGCTAGTATAAATAAA<br/> AATAGATAAACGTGGAATTACTTAGAGTTTCTGTGCATTAACGTTTTCTTCCAGTTGACAACATAAATG<br/> CGCTGCTGAGCAAGCCAGTTTGCATCTGTCAGGATCAATTTCCCATTATGCCAGTCATATTAATTAAGT<br/> TCAATTAGTTGATTTTTATTTTTGACATATACATGTGAATGAAAGACCCACCTGTAGGTTTGGCAAGCTA<br/> GCTTAAGTAACGCCATTTTGAAGGCATGGAAAAATACATAACTGAGAATAGAAAAGTTTCAAGTCAAGGT<br/> CAGGAACAGATGGAACAGCTGAATATGGCCAAACAGGATATCTGTGGTAAGCAGTTTCTGCCCCGGC<br/> TCAGGGCCAAAGAACAGATGGAACAGCTGAATATGGCCAAACAGGATATCTGTGGTAAGCAGTTTCTG<br/> CCCCGGCTCAGGGCCAAGAACAGATGGTCCCAGATGCGGTCCAGCCCTCAGCAGTTTCTAGAGAACC<br/> ATCAGATGTTTCCAGGGTCCCAAGGACCTGAAATGACCCTGTGCCTATTTGAACTAACCAATCAGT<br/> TCGCTTCTCGCTTCTGTTGCGCGCTTATGCTCCCCGAGCTCAATAAAAGACCCACAACCCCTCACTC<br/> GGGGCGCCAGTCCCTCCGATTGACTGAGTCGCCCGGGTACCCGTGTATCCAATAAACCCCTTGTGAGTT<br/> GCATCCGACTTGTGGTCTCGCTGTTCCCTGGGAGGGTCTCCTCTGAGTGATTGACTACCCGTCAGCGG<br/> GGGTCTTTCATTTGGGGGCTCGTCCGGGATCGGGAGACCCCTGCCAGGGACCACCGACCCACCACC<br/> GGGAGGTAAAGCTGGCCAGCAACTTATCTGTGTCTGTCCGATTGTCTAGTGTCTAGTACTGATTTTATG<br/> GCTGCGTCCGTAAGTCTGCTAAGTCTGCTGTATCTGGCGGACCCCGTGGTGAAGTCAAGGATGACGATTC<br/> GGAACACCCGGCCGAACCCCTGGGAGACGTCCAGGGACTTCGGGGGCGGTTTTTGTGGCCCGACCT<br/> GAGTCTAAAATCCCGATCGTTTAGGACTCTTTGGTGCACCCCTTAGAGGAGGGATATGTGGTCTG<br/> GTAGGAGACGAGAACCTAAACAGTTCGCCCTCCGCTGATTTTTGCTTTCGGTTTTGGGACCGAAGC<br/> CGCGCCGCGCTTGTCTGCTGCAGCATGTTCTGTGTTGTCTGTCTGTCTGTCTGTCTGTCTGTATTG<br/> TCTGAAAATATGGGCCCCGGGCTAGACTGTTACCCTCCCTAAGTTTACCTTAGGTCACTGGAAAGAT<br/> GTCCGAGCGGATCGCTCACAACAGTCCGTTAGATGTCAAGAAGAGACGTTGGGTTACCTTCTGCTCTGC<br/> AGAATGGCCAACCTTTAACGTCCGATGGCCGCGAGACGGCACCTTTAACCGACCTCATACCCAGG<br/> TTAAGATCAAGGTCTTTTACCTGGCCGCACTGGACCCAGACCCAGGTTCCAGCTACATCGTGAACCTGG<br/> GAAGCCTTGGCTTTTACCCTCCCTGGGTCAAGCCCTTTGTACACCCTAAGCCTCCGCCTCCTCTT<br/> CCTCCATCCGCCCGTCTCTCCCTTGAACCTCCTCGTTCCAGCCCGCTCGATCCTCCCTTATCCA<br/> GCCCTCACTCCTTCTAGGCGCCCCCATATGGCCATATGAGATCTTATATGGGGCACCCCGCCCTT<br/> GTAACCTCCCTGACCCTGACATGACAAGAGTTACTAACAGCCCTCTCTCCAAGTCACTTACAGGCT<br/> CTCTACTTAGTCCAGCACGAAGTCTGGAGACCTCTGGCGGACGCTACCAAGAACAACTGGACCGACC<br/> GGTGGTACCTCACCTTACCGAGTCCGCGACACAGTGTGGGTCCGCCGACACCAGACTAAGAACCTAG<br/> AACCTCGCTGGAAGGACCTTACACAGTCCGCTGACCACCCCCACCGCCCTCAAAGTAGACGGCATT<br/> GCAGCTTGGATACACGCCGCCACCATGGCCAGCCCTGACAAGATTCTGAGCCTGAACCTGTCTGC<br/> TGCTGGGCGAGTCCATCATCTCGGCAGCGGCGAGGCCCAAGTGCAACTCAGGAATCCGGAGCTGA<br/> GCTGGCCAGACCCGGAGCCAGCGTGAAGATGTCTGTAAGGCCTCCGGCTACACCTTACCAGGTACA<br/> CCATGCACTGGGTGAAGCAGAGGCCTGGCCAGGGCCTGGAGTGGATCGGCTACATCAATCCCAGCAG<br/> GGGCTACACCAATTACAATCAGAAGTTCAAGGACAAGGCCACCCTCACAACTGATAAGAGCAGCTCCA<br/> GGCCTACATGCAACTGAGCAGCCTGACCTCCGAGACTCCGCCGTGTAAGTGTGAGCAGACTAC<br/> GACGACCACTACTGCCTGGACTACTGGGGCCAGGGCACACAGTGACAGTGAGCTCCGGCGGGCGGGC<br/> GCTCCGGCGGGCGGGCAGCGGGCGGGCGGGAAGCGACATTCAGCTGACCCAGAGCCCGCTATCA<br/> TGTCGGCCAGCCCTGGAGAGAAGGTGACCATGACCTGCAGCGCCAGCAGCAGCGTGAGCTACATGAA<br/> TGTGTACCAGCAGAAGTCCGGCACCCAGCCCAAGAGGTGGATCTACGACACCAAGCAAGCTGGCTTCC<br/> GGCGTGCCTGCCACTTTAGAGGCAGCGGCTCCGGCACAGCTACAGCCTGACCATCAGCGGCATGG<br/> AGGCTGAAGACGCCGCCACTACTACTGTCAGCAGTGGTCTCCAACCCCTTACCTTCCGGCAGCGGC<br/> ACAAAGCTGGAGATCAAGAGAGCTTTGTTTATTTTTCAAATACATTCAAATATGTATCCGCTCATGAGAC<br/> AATAACCCGTGATAAATGCTTCAATAATATTGAAAAGGAAGATGAGTATTCAACATTTCCGTGTCGC<br/> CCTTATCCCTTTTTGCGGCATTTTGCCTTCTGTTTTTCTGCTACCCAGAAACGCTGGTGAAGTAAAA<br/> GATGCTGAAGATCAGTTGGGTGCACGAGTGGGTTACATCGAACTGGATCTCAACAGCGGTAAGATCCTT<br/> GAGAGTTTTCGCCCCGAAGAACGTTTTCCAATGATGAGCACTTTTAAAGTTCTGCTATGTGGCGGGTA<br/> TTATCCCGTATTGACCCGGGCAAGGCAACTCGGTCCCGCATAACTATTCTCAGAATGACTTGGTT<br/> GAGTACTACCAAGTACAGAAAAGCATCTTACGGATGGCATGACAGTAAGAAATTATGCAGTGTGCC<br/> ATAACCATGAGTGATAAAGTACTGCGGCCAATTAATCTGACAACGATCGGAGGACCGAAGGAGCTAACC<br/> GCTTTTTTGCACAACATGGGGGATCATGTAACCTGCCTTGTGCTGGGAACCCGGAGCTGAATGAAGCC<br/> ATACCAAACGACGAGCGTGACACCAGATGCCTGTAGCAATGGCAACAACGTTGCGCAAACCTATTAAC<br/> GGCGAACT</p> |
| <p>humanCD2<br/> 8scFv-<br/> P2A-<br/> humanIL15<br/> RA</p> | <p>CCGGTGGTACCTCACCTTACCGAGTCCGCGACACAGTGTGGGTCCGCCGACACCAGACTAAGAACCT<br/> AGAACCTCGCTGGAAGGACCTTACACAGTCCGCTGACCACCCCCACCGCCCTCAAAGTAGACGGCA<br/> TCGCAGCTTGGATACACGCCGCCACCATGGCTCCCCCTCACCAGGTTCTGAGCCTGAACCTGCT<br/> GCTGCTGGGCGAGAGCATCATCTGGGAAGCGGCGAGGCTCAGGTGCAGCTGCAGCAGAGCGGCAC<br/> CGAACTGGTGAAGCCTGCCTCCAGCGTGAAGATCAGCTGCAAGGCCAGCGGCTACACCTCCACAGC<br/> AACTACATGCACTGGATCAGGCAGCAGCCCGCAATGGCCTGGAGTGGATCGGCAGGATTTACCCCG<br/> GCAACGGCAACACCAATACATCAGAAGTTCGATGGCAAGGCCACCCCCACCGCTGACAAGTCTCC<br/> TCCACCGCCTACATGCAGCTGAGCAGACTGACCTTCGAGGATAGCGCCGTCTACTTCTGCGCTAGCGC<br/> CCCTCTGGACTACGGAGGCCACATCATGGACGCTGGGCCAGGGCACCACTGACATGAGTCTCC<br/> GGAGGGCGGGCAGCGGGCGGGCGGCGGAGGCGGCGGAGGCGGCGAGCGATATCCAGCTACCCAGAG<br/> CCCTGCCTTTCTGAGCGCCAGCCTGGGCGAGACCGTGAGCATTGAGTGCCTCGGCTCCGAGGACATC<br/> TAGGGCTACCTGGCCTGGTATCAGCAGAAGCCCGGCAAGAGCCCCAGCTGCTGATCTACGTGGCCAA<br/> CAGGCTGCAAGGATGGCGTGCCTAGCAGATTTAGCGCTGGGCGAGCGGAGCCAGCTGACATGCTCAAG<br/> ATCAGCGGATGCAGCCTGAGGACGAGGGCGACTACTACTGCCTCCAGGGCAGCAAGTTTCCCTCAC<br/> CTTCGGCAGCGCACCAAGCTGGAGATCAAAGGGCGGCCGCCACAACCACCCCGCTCCAGACCT</p>                                                                                                                                                                                                                                                                                                                                                                                                                                                                                                                                                                                                                                                                                                                                                                                                                                                                                                                                                                                                                                                                                                                                                                                                                                                                                                                                                                                                                                                                                                                                                                                                                                                                                                                                                                                                                                                                                                                                                                                                                                                                                                                                                                                                                                                                                                                                                                                                                                                                                                                                                                                                                                                                                                                                                                                                                                                                                                                                                                                                       |

CCTACACCCGCCCTACCATCGCCAGCCAACCTTTATCTTTAAGACCCGAGGCTTGTAGACCCGCCGT  
GGCGGCGCCGTGCACACAAGAGGACTGGACTTCGCTTGTGACATCTACATCTGGGCCCTCTGGCTG  
GAACTTGTGGCGTGTATTACTCTCTTTAGTGATTACTTTATATTGCAACCATAGGAATCGTAGGAGGGT  
GTGCAAGTGCCCTAGGCCGTGGTGAAGTCCGGCGCAAAACCCTCTTTAAGCGCTAGGTACGTGGGA  
GCGGAGCCACAACTTCTCTTTACTGAAGCAAGCTGGCGACGTGGAAGAAAACCCCGGTCCCATGGCC  
CCCAGAAGAGCCAGAGGCTGCAGAACCCTCGGACTGCCCGCTTTACTGCTGCTGTTACTGCTGAGACC  
CCCCGCTACCAGAGGCATTACTTGTCCCCCTCCCATGAGCGTCGAGCATGCCGACATCTGGGTGAAGA  
GCTACTCTTTATATTCTCGTGAGAGGTACATCTGCAACTCCGGCTTCAAGAGAAAGGCCGGCACAAAGCT  
CTTTAACCGAGTGCCTGTGAACAAGGCTACAAACGTGGCCACTGGACCACCCCTCTTTAAATGCA  
TTCGTGATCCCGCTCTGGTGACCCAGAGACCCGCTCCTCCTCCACCGTGACCACAGCCGAGTGACC  
CCTCAGCCGAATCCCTCTCCCCCTCCGGAAGGAGCCCGCTGCCTCCAGCCCTCCAGCAACAACAC  
AACCACCGAGATCAGCAGCCACGAGAGCTCCACGGAACACCCAGCCAGACCACCCGCAAGAATTGGG  
AACTGACCGCTCCGCCAGCCATCAGCCTCCCGCGTGTATCCTCAAGGTCACAGCGACACCACAGTG  
GCCATTTCCACCAGCACCGTGTATTATGCGGACTGTCCGCTGTGCTTTACTGGCTTGTATTTAAAGT  
CTCGTCAGACCCCTCCTCTGGCTCCGTGGAGATGGAGCCATGGAGGCTTTACCCGTGACTTGGGGA  
ACCTCCTCTCGTGACGAGGATTTAGAGAAGTGCAGCCATCATTATGACAGCCACTGGGACTCCGATT  
AGTCCAATTTGTTAAAGACAGGATATCAGTGGTCCAGGCTCTAGTTTTGACTCAACAATATCACCAGCTG  
AAGCCTATAGAGTACGAGCCATAGATAAAAATAAAGATTTTATTTAGTCTCCAGAAAAGGGGGGAATGA  
AAGACCCACCTGTAGGTTTGGCAAGTAGCTTAAGTAACGCCATTTTGAAGGCATGGAAAAATACAT  
AACTGAGAATAGAGAAGTTTCAGATCAAGGTCAGGAACAGATGGAACAGCTGAATATGGGCCAAACAGG  
ATATCTGTGGTAAGCAGTTCTGCCCGGCTCAGGGCCAAGAACAGATGGAACAGCTGAATATGGGCC  
AAACAGGATATCTGTGTAAGCAGTTCTGCCCGGCTCAGGGCCAAGAACAGATGGTCCCAGATGC  
GGTCCAGCCCTCAGCAGTTTCTAGAGAACCATCAGATGTTTCCAGGGTGCCCAAGGACTGAAATGA  
CCCTGTGCCTTATTTGAACATAACCAATCAGTTCCGTTCTCGCTTCTGTTCCGCGCTTCTGCTCCCGA  
GCTCAATAAAAGAGCCCAACCCCTCACTCGGGGCGCCAGTCTCCGATTGACTGAGTCGCCCGGGT  
ACCCGTGTATCCAATAAACCTCTTGCAGTTGCATCCGACTTGTGGTCTCGCTGTTCTTGGGAGGGTC  
TCCTCTGAGTGATTGACTACCCGTACGCGGGGCTTTTACACATGCAGCATGTACAAAATTAATTTG  
TTTTTTTTTTTAAAGTATTTACATTAATGGCCATAGTACTTAAAGTTACATTGGCTCTTCTGAAATAACA  
TGGAGTATTCAGAATGTGTCATAAATATTTCTAATTTAAGATAGTATCTCCATTGGCTTCTACTTTTTCT  
TTTTTTTTTTTTGCTCTGTCTCCATTTGTTGTTGTTGTTGTTGTTGTTGTTGTTGTTGTTGTTGTTG  
TTAATTTTTTTTTAAAGATCCTACACTATAGTTCAAGCTAGACTATTAAGTACTCTGTAACCCAGGGTGAC  
CTTGAAGTCATGGGTAGCCTGCTGTTTTAGCCTTCCCACATCTAAGATTACAGGATGAGCTATCATT  
TTGATATTTGATTGATTGATTGATTGATGTGTGTGTGTGTGTGTGTGTGTGTGTGTGTGTGTGTGT  
GTGTGTATGGGTGTGTGTGAATGTGTGTATGTGTGTGTGTGTGTGTGTGTGTGTGTGTGTGTGTGT  
TGTGTGTGTGTGTGAAAAAATTTCTATGGTAGTGAGAGCCAACGCTCCGGCTCAGGTGTGACGGTGGT  
TTTTGAGACAGAGTCTTTCACCTAGCTTGAATTCACCTGGCCGTCTGTTTTACAACCTGTGACTGGGAAA  
ACCCTGGCGTTACCCAACCTAATCGCCTTGCAGCACATCCCCCTTTCCGACGCTGGCGTAATAGCGAAG  
AGGCCCGCACCGATCGCCCTTCCAACAGTTGCGCAGCCTGAATGGCGAATGGCGCCTGATGCGGTA  
TTTTCTCCTTACGCATCTGTGCGGTATTTACACCCGCATATGGTGCACCTCAGTACAATCTGCTCTGAT  
CCCGCATAGTTAAGCCAGCCCGACACCCGCAACACCCGCTGACGCGCCCTTGTCTGTC  
TCCCGCATCCGCTTACAGACAAGCTGTGACCGTCTCCGGGAGCTGCATGTGTGACAGGTTTTACCCG  
TCATACCGAAACGCGGATGACGAAAGGGCCTCGTGATACGCCTATTTTTATAGGTTAATGTCATGAT  
ATAAATGGTTTCTTAGACGTCAGGTGGCCTTTTCCGGGAAATGTGCGCGGAACCCCTATTTGTTATTT  
TTCTAAATACATTCAAATATGTATCCGCTCATGAGACAATAACCCCTGATAAATGCTTCAATAATATGAAA  
AAGGAAGATGATGAGTATTCAACTTTCCGCTGCGCCCTTATCCCTTTTTTCCGGCATTTGCTTCCCT  
GTTTTTGTCAACCCAGAACGCTGGTGAAGTAAAAGATGCTGAAGATCAGTTGGGTGCACGAGTGGGT  
TACATCGAACTGGATCTCAACAGCGGTAAGATCCTTGAAGTTTTCCGCCGGAAGAACGTTTTCCAATG  
ATGAGCACTTTTAAAGTTCTGCTATGTGGCGCGGTATTATCCCGTATTGACGCCGGCAAGAGCAACT  
GGTCGCCGCATACACTATTCTCAGAATGACTTGGTTGAGTACTCACCAGTACAGAAAAGCATCTTACG  
GATGGCATGACAGTAAGAGAATTATGCAGTGTGCCATAACCATGAGTGATAACACTGCGGCCAACTTA  
CTTCTGACAACGATCGGAGGACCGAAGGAGCTAACCCTTTTTGCACAACATGGGGGATCATGTAAC  
CGCCTTGATCGTTGGGAACCGGAGCTGAATGAAGCCATACCAACGACGAGCGTGACACCAGATGCC  
GTAGCAATGGCAACAACGTTGCGCAAACTATTAACCTGGCGAACTACTTACTCTAGCTTCCCGGCAACA  
ATTAATAGACTGGATGGAGGCGGATAAAGTTGCAGGACCCTTCTGCGCTCGGCCCTTCCGGCTGGCT  
GGTTTTATTGCTGATAAATCTGGAGCCGGTGAAGCTGGTCTCGCGGTATCATTGCAGCACTGGGGCCA  
GATGGTAAGCCCTCCCGTATCGTAGTTATCTACACGACGGGAGTCAGGCAACTATGGATGAACGAAAT  
AGACAGATCGCTGAGATAGGTGCCTCACTGATTAAGCACTGGTAACTGTCAGACCAAGTTTACTCATATA  
ACTTTAGATTGATTTAAACTTCAATTTTTAATTTAAAGGATCTAGGTGAAGATCCTTTTTGATAATCTCA  
TGACCAAAATCCCTTAAAGTGAAGTTTCTGTTCCACTGAGCGTCAGACCCCTAGAAAAGATCAAAGGAT  
CTTCTTGAAGATCCTTTTTTCTGCGCGTAATCTGCTGCTTGAACAACAAAAAACCCGCTACCAGCGGT  
GGTTTTGTTGCCGATCAAGAGCTACCAACTTTTTTCCGAAGGTAACGGCTTCCAGCAGAGCGCAGAT  
ACCAATACTGTCTTCTAGTGTAGCCGATAGTAGGCCACCACTTCAAGAAGCTGTGACAGCCGCTAC  
ATACCTCGCTCTGCTAATCCTGTTACCAAGTGGCTGCTGCCAGTGGCGATAAGTCGTGTCTTACCGGGT  
GGACTCAAGACGATAGTTACCGGATAAGGCGCAGCGGTCCGGCTGAACGGGGGGTTCGTGCACACAG  
CCCAGCTTGAGCGAACGACCTACACCGAACTGAGATACCTACAGCGTGAGCATTTGAGAAAAGCGCCAC  
GCTTCCGGAAGGAGAAAAGCGGACAGGTATCCGGTAAAGCGGACAGGTCGGAACGCTGTGACAGCCGAC  
GAGGGAGCTTCCAGGGGAAACGCCTGGTATCTTTATAGTCTGTGGGTTTTCCGCCACCTCTGACTTG  
AGCGTCGATTTTTGTGATGCTCGTCAGGGGGCGGAGCCTATGAAAAACGCCAGCAACGCGCCTTT

|                                                                                                                                                                                                                                                                                                                                                                                                                                                                                                                                                                                                                                                                                                                                                                                                                                                                                                                                                                                                                                                                                                                                                                                                                                                                                                                                                                                                                                                                                                                                                                                                                                                                                                                                                                                                                                                                                                                                                                                                                                                                                                                                                                                                                                                                                                                                                                                                                                                                                                                                                                                                                                                                                                                                                                |
|----------------------------------------------------------------------------------------------------------------------------------------------------------------------------------------------------------------------------------------------------------------------------------------------------------------------------------------------------------------------------------------------------------------------------------------------------------------------------------------------------------------------------------------------------------------------------------------------------------------------------------------------------------------------------------------------------------------------------------------------------------------------------------------------------------------------------------------------------------------------------------------------------------------------------------------------------------------------------------------------------------------------------------------------------------------------------------------------------------------------------------------------------------------------------------------------------------------------------------------------------------------------------------------------------------------------------------------------------------------------------------------------------------------------------------------------------------------------------------------------------------------------------------------------------------------------------------------------------------------------------------------------------------------------------------------------------------------------------------------------------------------------------------------------------------------------------------------------------------------------------------------------------------------------------------------------------------------------------------------------------------------------------------------------------------------------------------------------------------------------------------------------------------------------------------------------------------------------------------------------------------------------------------------------------------------------------------------------------------------------------------------------------------------------------------------------------------------------------------------------------------------------------------------------------------------------------------------------------------------------------------------------------------------------------------------------------------------------------------------------------------------|
| <p> TTACGGTTCCTGGCCTTTTGTCTGGCCTTTTGTCTCACATGTTCTTTCCTGCGTTATCCCCTGATTCTGTGG<br/> ATAACCGTATTACCGCCTTTGAGTGAGCTGATACCGCTCGCCGCAGCCGAACGACCGAGCGCAGCGAG<br/> TCAGTGAGCGAGGAAGCGGAAGAGCGCCCAATACGCAAACCGCCTCTCCCCGCGGTTGGCCGATT<br/> ATTAATGCAGCTGGCACGACAGGTTTCCCGACTGGAAAGCGGGCAGTGAGCGCAACGCAATTAATGTG<br/> AGTTAGCTCACTCATTAGGCACCCCCAGGCTTTACACTTTATGCTTCCGGCTCGTATGTTGTGTGGAATTG<br/> TGAGCGGATAACAATTTACACAGGAAACAGCTATGACCATGATTACGCCAAGCTTTGCTCTTAGGAGT<br/> TTCCATAACATCCCAAACCTCAAATATATAAAGCATTGACTTGTCTATGCCCTAGGGGGCGGGGGGAA<br/> GCTAAGCCAGCTTTTTTAAACATTTAAAATGTTAATTCATTTTAAATGCACAGATGTTTTATTTTATAAG<br/> GGTTTCAATGTGCATGAATGCTGCAATATTCCTGTTACCAAAGCTAGTATAAATAAAAAATAGATAAACGT<br/> GGAAATTACTTAGAGTTTCTGTCTAATACGTTTCTTCCCTCAGTTGACAACATAAATGCGCTGCTGAGCA<br/> AGCCAGTTTGCATCTGTCAGGATCAATTTCCATTATGCCAGTCATATTAATTAAGTCAATTAAGTTGAT<br/> TTTTATTTTTGACATATACATGTGAATGAAAGACCCACCTGTAGGTTTGGCAAGCTTAAGTAACG<br/> CCATTTTGAAGGCATGGAAAAATACATAAAGTGAATAAGAAAAGTTGAGTCAAGGTCAGGAACAGAT<br/> GGAACAGCTGAATATGGGCCAAACAGGATATCTGTGGTAAGCAGTTCCCTGCCCGGCTCAGGGCCAAG<br/> AACAGATGGAACAGCTGAATATGGGCCAAACAGGATATCTGTGGTAAGCAGTTCCCTGCCCGGCTCAG<br/> GGCCAAGAACAGATGGTCCCAGATGCGGTCCAGCCCTCAGCAGTTTCTAGAGAACCATCAGATGTTT<br/> CCAGGGTGCCCCAAGGACCTGAAATGACCCCTGTCCCTTATTTGAACTAACCAATCAGTTCCGCTTCTCGC<br/> TTCTGTTCCGCGCTTATGCTCCCCGAGCTCAATAAAGAGCCCACAACCCCTCACTCGGGGCGCCAG<br/> TCCTCCGATTGACTGAGTCGCCCCGGGTACCCGTGTATCCAATAAACCCCTCTTGCAGTTGCATCCGACTT<br/> GTGGTCTCGCTGTTCTTGGGAGGGTCTCCTCTGAGTGATTGACTACCCGTGACGCGGGGGTCTTTTATT<br/> TGGGGGCTCGTCCGGGATCGGGAGACCCCTGCCAGGGACCACCGACCCACCACCGGGAGGTAAGC<br/> TGGCCAGCAACTTATCTGTGTCTGTCCGATTGTCTAGTGTCTATGACTGATTTTTATGCGCCTGCGTCCGT<br/> ACTAGTTAGCTAACTAGCTCTGTATCTGGCCGACCCGTGGTGGAAGTACGAGTTCGGAACACCCCGC<br/> CGCAACCCCTGGGAGACGTCCCAGGGACTTCGGGGGGCCGTTTTTGTGGCCCGACCTGAGTCCTAAAATC<br/> CCGATCGTTTAGGACTCTTTGGTGCACCCCTTAGAGGAGGGATATGTGTTCTGGTAGGAGACGAG<br/> AACCTAAAACAGTTCCCGCTCCGTCTGAATTTTTGCTTTTGGTTTGGGACCGAAGCCGCGCCGCGCT<br/> CTTGCTGCTGCAGCATCGTTCTGTGTTGTCTGTCTGACTGTGTTTCTGTATTTGTCTGAAAATATGG<br/> GCCCGGGCTAGACTGTTACCACTCCCTAAGTTTACCTTAGGTCAGTGGAAAGATGTCGAGCGGATC<br/> GCTACAACCAAGTCGGTAGATGTCAAGAAGAGACGTTGGTTACCTTCTGCTGCAAGATGGCCAAC<br/> CTTTAACGTCGGATGGCCGCGAGACGGCACCTTTAACCGAGACCTCATCACCCAGGTTAAGATCAAGG<br/> TCTTTTACCTGGCCGCATGGACACCCAGACCAGTCCCCTACATCGTACCTGGGAAGCCTTGGCT<br/> TTTGACCCCCCTCCCTGGGTCAAGCCCTTTGTACACCCTAAGCCCTCCGCTCCTCTTCTCCATCCGCC<br/> CCGTCTCTCCCCCTTGAACCTCCTCGTTCCGACCCCGCTCGATCCTCCCTTTATCCAGCCCTCACTCCT<br/> TCTTAGGCGCCCCATATGGCCATATGAGATCTTATATGGGGCACCCCGCCCTTGTAAACTTCCCT<br/> GACCCTGACATGACAAGAGTTACTAACAGCCCTCTCTCCAAGCTCACTTACAGGCTCTACTTAGTC<br/> CAGCACGAAGTCTGGAGACCTCTGGC<br/> GGCAGCTACCAAGAACAACCTGGACCGA </p> |
|----------------------------------------------------------------------------------------------------------------------------------------------------------------------------------------------------------------------------------------------------------------------------------------------------------------------------------------------------------------------------------------------------------------------------------------------------------------------------------------------------------------------------------------------------------------------------------------------------------------------------------------------------------------------------------------------------------------------------------------------------------------------------------------------------------------------------------------------------------------------------------------------------------------------------------------------------------------------------------------------------------------------------------------------------------------------------------------------------------------------------------------------------------------------------------------------------------------------------------------------------------------------------------------------------------------------------------------------------------------------------------------------------------------------------------------------------------------------------------------------------------------------------------------------------------------------------------------------------------------------------------------------------------------------------------------------------------------------------------------------------------------------------------------------------------------------------------------------------------------------------------------------------------------------------------------------------------------------------------------------------------------------------------------------------------------------------------------------------------------------------------------------------------------------------------------------------------------------------------------------------------------------------------------------------------------------------------------------------------------------------------------------------------------------------------------------------------------------------------------------------------------------------------------------------------------------------------------------------------------------------------------------------------------------------------------------------------------------------------------------------------------|

**Table S1.** Nucleotide sequences of constructs

**Table S2**

|         | Day 7: Seeding density of Total number of cells per G-REX100 MCS Flask | Day 7: Number of $\gamma\delta$ T cells per Flask | # of G-REX 100MCS flasks used | Day 17: Total number of $\gamma\delta$ T cells at harvest |
|---------|------------------------------------------------------------------------|---------------------------------------------------|-------------------------------|-----------------------------------------------------------|
| Donor 1 | $5 \times 10^6$ cells/flask                                            | $4.68 \times 10^6$ cells/flask                    | 1                             | $3.3 \times 10^9$ cells                                   |
| Donor 2 | $5 \times 10^6$ cells/flask                                            | $2.22 \times 10^6$ cells/flask                    | 1                             | $2.65 \times 10^8$ cells                                  |
| Donor 3 | $5 \times 10^6$ cells/flask                                            | $4.38 \times 10^6$ cells/flask                    | 1                             | $2.58 \times 10^9$ cells                                  |

**Table S2.** Total viable counts of  $\gamma\delta$  T cells after 10 days expansion in the presence of aAPCs.
